# Supplementary material for: Hyperglycemia and Adverse Pregnancy Outcomes
Source: Atypon-hosted journal article supplement (doi:10.1056/nejmoa0707943), 2008-05-07
Supplement: nejm_hapo_1991sa1.pdf [file nejm_hapo_1991sa1.pdf]

## Supplementary Appendix

This appendix has been provided by the authors to give readers additional information about their work.

Supplement to: The HAPO Study Cooperative Research Group. Hyperglycemia and adverse pregnancy outcomes. N Engl J Med 2008;358:1991-2002.

**Table A. Additional Characteristics and Details of Outcomes of HAPO Participants**

| <b>Maternal Characteristics</b>       | <b>N</b> | <b>Mean</b> | <b>SD</b> | <b>Range Among Centers (Mean Values)</b> |
|---------------------------------------|----------|-------------|-----------|------------------------------------------|
| Education (yrs)                       | 21,321   | 13.0        | 3.4       | 10.1 – 17.5                              |
| <b>Newborn Characteristics</b>        | <b>N</b> | <b>Mean</b> | <b>SD</b> | <b>Range Among Centers (Mean Values)</b> |
| Length (cms)                          | 22,601   | 49.7        | 2.4       | 48.7 – 50.9                              |
| Head Circumference (cms)              | 22,974   | 34.2        | 1.6       | 33.5 – 35.0                              |
| <b>Obstetric Outcomes</b>             | <b>N</b> | <b>%</b>    |           | <b>Range Among Centers (%)</b>           |
| Type of Delivery                      |          |             |           |                                          |
| Unassisted Vaginal                    | 15,756   | 67.6        |           | 54.6 – 84.4                              |
| Vaginal Instrumental                  | 1,997    | 8.6         |           | 1.9 – 14.4                               |
| Breech                                | 40       | 0.2         |           |                                          |
| Primary Cesarean Section              | 3,731    | 16.0        |           | 8.6 – 23.5                               |
| Repeat Cesarean Section               | 1,792    | 7.7         |           | 3.3 – 11.8                               |
| <b>Newborn Outcomes</b>               | <b>N</b> | <b>%</b>    |           | <b>Range Among Centers (%)</b>           |
| Shoulder Dystocia and/or Birth Injury | 311      | 1.3         |           | 0.1 – 3.4                                |
| Shoulder Dystocia only                | 172      | 0.7         |           |                                          |
| Birth Injury only                     | 99       | 0.4         |           |                                          |
| Shoulder Dystocia + Birth Injury      | 40       | 0.2         |           |                                          |

**Table B. Relationship between maternal glucose and birthweight > 90<sup>th</sup> percentile\*.**

| <b>FPG (mg/dL)</b>     | <b>N</b> | <b>#</b> | <b>%</b> | <b>Model I OR</b> | <b>95% CI</b> | <b>Model II OR</b> | <b>95% CI</b> |
|------------------------|----------|----------|----------|-------------------|---------------|--------------------|---------------|
| < 75                   | 4,035    | 213      | 5.3      | 1.00              |               | 1.00               |               |
| 75 - 79                | 7,501    | 572      | 7.6      | 1.48              | (1.26 – 1.74) | 1.37               | (1.16 – 1.62) |
| 80 - 84                | 6,168    | 622      | 10.1     | 2.01              | (1.71 – 2.36) | 1.72               | (1.46 – 2.03) |
| 85 - 89                | 2,741    | 323      | 11.8     | 2.40              | (2.00 – 2.87) | 1.95               | (1.62 – 2.35) |
| 90 - 94                | 1,883    | 310      | 16.5     | 3.54              | (2.94 – 4.25) | 2.73               | (2.25 – 3.31) |
| 95 - 99                | 672      | 124      | 18.5     | 4.06              | (3.20 – 5.16) | 3.00               | (2.34 – 3.86) |
| >= 100                 | 217      | 57       | 26.3     | 6.39              | (4.58 – 8.91) | 5.01               | (3.54 – 7.09) |
| <b>1-hr PG (mg/dL)</b> | <b>N</b> | <b>#</b> | <b>%</b> | <b>Model I OR</b> | <b>95% CI</b> | <b>Model II OR</b> | <b>95% CI</b> |
| ≤ 105                  | 4,177    | 268      | 6.4      | 1.00              |               | 1.00               |               |
| 106 - 132              | 7,524    | 584      | 7.8      | 1.23              | (1.06 – 1.43) | 1.21               | (1.04 – 1.41) |
| 133 – 155              | 6,003    | 593      | 9.9      | 1.60              | (1.38 – 1.86) | 1.65               | (1.41 – 1.93) |
| 156 – 171              | 2,768    | 352      | 12.7     | 2.13              | (1.80 – 2.51) | 2.27               | (1.91 – 2.71) |
| 172 – 193              | 1,858    | 264      | 14.2     | 2.42              | (2.02 – 2.89) | 2.66               | (2.19 – 3.21) |
| 194 – 211              | 645      | 111      | 17.2     | 3.03              | (2.39 – 3.85) | 3.50               | (2.72 – 4.50) |
| >= 212                 | 242      | 49       | 20.2     | 3.70              | (2.64 – 5.19) | 4.49               | (3.16 – 6.39) |
| <b>2-hr PG (mg/dL)</b> | <b>N</b> | <b>#</b> | <b>%</b> | <b>Model I OR</b> | <b>95% CI</b> | <b>Model II OR</b> | <b>95% CI</b> |
| ≤ 90                   | 4,264    | 297      | 7.0      | 1.00              |               | 1.00               |               |
| 91 – 108               | 7,422    | 587      | 7.9      | 1.15              | (0.99 – 1.33) | 1.11               | (0.96 – 1.30) |
| 109 – 125              | 5,865    | 580      | 9.9      | 1.47              | (1.27 – 1.70) | 1.51               | (1.30 – 1.75) |
| 126 – 139              | 3,024    | 396      | 13.1     | 2.01              | (1.72 – 2.36) | 2.15               | (1.82 – 2.54) |
| 140 – 157              | 1,720    | 210      | 12.2     | 1.86              | (1.54 – 2.24) | 2.10               | (1.73 – 2.56) |
| 158 – 177              | 690      | 101      | 14.6     | 2.29              | (1.80 – 2.92) | 2.68               | (2.08 – 3.45) |
| >= 178                 | 232      | 50       | 21.6     | 3.67              | (2.63 – 5.13) | 4.46               | (3.15 – 6.33) |

\*Birthweight > 90<sup>th</sup> percentile: 90<sup>th</sup> percentiles for gestational age (30-44 weeks only) were determined using quantile regression analyses for each of 8 newborn gender-ethnic groups (Caucasian or Other, Black, Hispanic, Asian), with adjustment for gestational age, field center, and parity (0, 1, 2+). A newborn was considered to have a birthweight > 90<sup>th</sup> percentile if the birthweight was greater than the estimated 90<sup>th</sup> percentile for the baby's sex, gestational age, ethnicity, field center, and maternal parity. Otherwise, the newborn was considered to have a birthweight ≤ 90<sup>th</sup> percentile.

Model I: Adjusted for variables used in estimating 90<sup>th</sup> percentiles

Model II: Additional adjustment for age, BMI, BMI<sup>2</sup>, height, smoking, alcohol use, hospitalization prior to delivery, any family history of diabetes, mean arterial blood pressure, gestational age at

OGTT N = total number in the glucose category (excluding births with gestational age < 30 weeks and fetal deaths), # = number in the glucose category with the outcome, % = proportion in the glucose category with the outcome

**Table C. Relationship between maternal glucose and primary cesarean section<sup>1</sup>.**

| <b>FPG (mg/dL)</b>     | <b>N</b> | <b>#</b> | <b>%</b> | <b>Model I OR</b> | <b>95% CI</b> | <b>Model II OR</b> | <b>95% CI</b> |
|------------------------|----------|----------|----------|-------------------|---------------|--------------------|---------------|
| < 75                   | 3,721    | 495      | 13.3     | 1.00              |               | 1.00               |               |
| 75 - 79                | 6,806    | 1,151    | 16.9     | 1.30              | (1.16 – 1.46) | 1.19               | (1.06 – 1.34) |
| 80 - 84                | 5,483    | 1,014    | 18.5     | 1.46              | (1.30 – 1.65) | 1.21               | (1.07 – 1.37) |
| 85 - 89                | 2,378    | 506      | 21.3     | 1.76              | (1.53 – 2.03) | 1.33               | (1.15 – 1.54) |
| 90 - 94                | 1,601    | 380      | 23.7     | 2.08              | (1.78 – 2.42) | 1.44               | (1.23 – 1.69) |
| 95 - 99                | 560      | 134      | 23.9     | 2.17              | (1.74 – 2.71) | 1.39               | (1.11 – 1.75) |
| >= 100                 | 183      | 51       | 27.9     | 2.73              | (1.94 – 3.85) | 1.60               | (1.12 – 2.27) |
| <b>1-hr PG (mg/dL)</b> | <b>N</b> | <b>#</b> | <b>%</b> | <b>Model I OR</b> | <b>95% CI</b> | <b>Model II OR</b> | <b>95% CI</b> |
| ≤ 105                  | 3,826    | 458      | 12.0     | 1.00              |               | 1.00               |               |
| 106 - 132              | 6,792    | 1,113    | 16.4     | 1.36              | (1.21 – 1.53) | 1.21               | (1.07 – 1.36) |
| 133 – 155              | 5,311    | 1,032    | 19.4     | 1.60              | (1.41 – 1.80) | 1.26               | (1.11 – 1.42) |
| 156 – 171              | 2,425    | 522      | 21.5     | 1.77              | (1.54 – 2.04) | 1.31               | (1.13 – 1.52) |
| 172 – 193              | 1,623    | 407      | 25.1     | 2.16              | (1.85 – 2.51) | 1.48               | (1.26 – 1.74) |
| 194 – 211              | 547      | 132      | 24.1     | 2.02              | (1.61 – 2.52) | 1.30               | (1.04 – 1.64) |
| >= 212                 | 208      | 67       | 32.2     | 2.97              | (2.18 – 4.06) | 1.86               | (1.35 – 2.57) |
| <b>2-hr PG (mg/dL)</b> | <b>N</b> | <b>#</b> | <b>%</b> | <b>Model I OR</b> | <b>95% CI</b> | <b>Model II OR</b> | <b>95% CI</b> |
| ≤ 90                   | 3,903    | 535      | 13.7     | 1.00              |               | 1.00               |               |
| 91 – 108               | 6,664    | 1,032    | 15.5     | 1.09              | (0.97 – 1.22) | 0.97               | (0.86 – 1.09) |
| 109 – 125              | 5,201    | 1,017    | 19.6     | 1.39              | (1.24 – 1.56) | 1.11               | (0.99 – 1.26) |
| 126 – 139              | 2,650    | 583      | 22.0     | 1.58              | (1.38 – 1.80) | 1.15               | (1.00 – 1.32) |
| 140 – 157              | 1,506    | 350      | 23.2     | 1.67              | (1.43 – 1.95) | 1.17               | (0.99 – 1.37) |
| 158 – 177              | 615      | 162      | 26.3     | 2.00              | (1.63 – 2.45) | 1.32               | (1.06 – 1.63) |
| >= 178                 | 193      | 52       | 26.9     | 2.10              | (1.50 – 2.93) | 1.28               | (0.91 – 1.81) |

Model I: Adjusted for field center

Model II: Adjusted for field center, age, BMI, BMI<sup>2</sup>, height, smoking, alcohol use, hospitalization prior to delivery, any family history of diabetes, mean arterial blood pressure, gestational age at OGTT, baby's sex

N = total number in the glucose category, # = number in the glucose category with the outcome,

% = proportion in the glucose category with the outcome

<sup>1</sup>Excluding those with a prior cesarean section.

**Table D. Relationship between maternal glucose and clinical neonatal hypoglycemia\*.**

| <b>FPG (mg/dL)</b>     | <b>N</b> | <b>#</b> | <b>%</b> | <b>Model I OR</b> | <b>95% CI</b> | <b>Model II OR</b> | <b>95% CI</b> |
|------------------------|----------|----------|----------|-------------------|---------------|--------------------|---------------|
| < 75                   | 4,043    | 83       | 2.1      | 1.00              |               | 1.00               |               |
| 75 - 79                | 7,503    | 144      | 1.9      | 0.97              | (0.74 – 1.28) | 0.91               | (0.69 – 1.21) |
| 80 - 84                | 6,164    | 122      | 2.0      | 1.04              | (0.78 – 1.38) | 0.92               | (0.68 – 1.23) |
| 85 - 89                | 2,744    | 59       | 2.2      | 1.19              | (0.84 – 1.69) | 1.00               | (0.70 – 1.43) |
| 90 - 94                | 1,884    | 48       | 2.5      | 1.51              | (1.05 – 2.19) | 1.19               | (0.81 – 1.75) |
| 95 - 99                | 672      | 14       | 2.1      | 1.34              | (0.75 – 2.39) | 1.01               | (0.55 – 1.84) |
| >= 100                 | 217      | 10       | 4.6      | 2.69              | (1.35 – 5.35) | 1.98               | (0.97 – 4.05) |
| <b>1-hr PG (mg/dL)</b> | <b>N</b> | <b>#</b> | <b>%</b> | <b>Model I OR</b> | <b>95% CI</b> | <b>Model II OR</b> | <b>95% CI</b> |
| ≤ 105                  | 4,183    | 72       | 1.7      | 1.00              |               | 1.00               |               |
| 106 - 132              | 7,523    | 153      | 2.0      | 1.21              | (0.91 – 1.61) | 1.12               | (0.84 – 1.49) |
| 133 – 155              | 6,003    | 131      | 2.2      | 1.44              | (1.08 – 1.94) | 1.24               | (0.92 – 1.68) |
| 156 – 171              | 2,772    | 54       | 1.9      | 1.37              | (0.96 – 1.98) | 1.11               | (0.77 – 1.62) |
| 172 – 193              | 1,860    | 45       | 2.4      | 1.96              | (1.33 – 2.88) | 1.48               | (0.99 – 2.22) |
| 194 – 211              | 643      | 20       | 3.1      | 2.85              | (1.70 – 4.77) | 2.17               | (1.28 – 3.69) |
| >= 212                 | 243      | 5        | 2.1      | 1.71              | (0.68 – 4.33) | 1.29               | (0.51 – 3.31) |
| <b>2-hr PG (mg/dL)</b> | <b>N</b> | <b>#</b> | <b>%</b> | <b>Model I OR</b> | <b>95% CI</b> | <b>Model II OR</b> | <b>95% CI</b> |
| ≤ 90                   | 4,266    | 78       | 1.8      | 1.00              |               | 1.00               |               |
| 91 – 108               | 7,421    | 134      | 1.8      | 0.92              | (0.69 – 1.22) | 0.87               | (0.66 – 1.17) |
| 109 – 125              | 5,868    | 117      | 2.0      | 1.08              | (0.80 – 1.45) | 0.96               | (0.71 – 1.30) |
| 126 – 139              | 3,027    | 80       | 2.6      | 1.47              | (1.06 – 2.02) | 1.23               | (0.88 – 1.71) |
| 140 – 157              | 1,720    | 44       | 2.6      | 1.43              | (0.98 – 2.10) | 1.13               | (0.76 – 1.68) |
| 158 – 177              | 693      | 21       | 3.0      | 1.82              | (1.11 - 3.00) | 1.36               | (0.81 – 2.28) |
| >= 178                 | 232      | 6        | 2.6      | 1.54              | (0.66 – 3.62) | 1.12               | (0.47 – 2.67) |

\*Clinical neonatal hypoglycemia: Clinical neonatal hypoglycemia was defined as present if there was notation of neonatal hypoglycemia in the medical record and there were symptoms and/or treatment with a glucose infusion or a local laboratory report of a glucose value ≤ 30.6 mg/dL (1.7 mmol/L) in the first 24 hours and/or ≤ 45 mg/dL (2.5 mmol/L) after the first 24 hours after birth.

Model I: Adjusted for field center

Model II: Adjusted for field center, age, BMI, height, parity, smoking, alcohol use, hospitalization prior to delivery, any family history of diabetes, mean arterial blood pressure, mean arterial blood pressure squared, gestational age at OGTT, baby's sex

N = total number in the glucose category (excluding fetal deaths), # = number in the glucose category with the outcome, % = proportion in the glucose category with the outcome

**Table E. Relationship between maternal glucose and cord C-peptide > 90<sup>th</sup> percentile\*.**

| <b>FPG (mg/dL)</b>     | <b>N</b> | <b>#</b> | <b>%</b> | <b>Model I OR</b> | <b>95% CI</b>  | <b>Model II OR</b> | <b>95% CI</b>  |
|------------------------|----------|----------|----------|-------------------|----------------|--------------------|----------------|
| < 75                   | 3,546    | 131      | 3.7      | 1.00              |                | 1.00               |                |
| 75 - 79                | 6,453    | 378      | 5.9      | 1.62              | (1.32 – 1.98)  | 1.41               | (1.15 – 1.74)  |
| 80 - 84                | 5,255    | 429      | 8.2      | 2.31              | (1.88 – 2.83)  | 1.75               | (1.42 – 2.15)  |
| 85 - 89                | 2,308    | 266      | 11.5     | 3.33              | (2.67 – 4.15)  | 2.36               | (1.88 – 2.97)  |
| 90 - 94                | 1,592    | 281      | 17.7     | 5.58              | (4.47 – 6.96)  | 3.62               | (2.87 – 4.58)  |
| 95 - 99                | 561      | 131      | 23.4     | 7.85              | (6.00 – 10.26) | 4.46               | (3.36 – 5.93)  |
| >= 100                 | 170      | 55       | 32.4     | 12.42             | (8.57 – 18.01) | 7.65               | (5.17 – 11.32) |
| <b>1-hr PG (mg/dL)</b> | <b>N</b> | <b>#</b> | <b>%</b> | <b>Model I OR</b> | <b>95% CI</b>  | <b>Model II OR</b> | <b>95% CI</b>  |
| ≤ 105                  | 3,593    | 176      | 4.9      | 1.00              |                | 1.00               |                |
| 106 - 132              | 6,372    | 366      | 5.7      | 1.21              | (1.01 – 1.46)  | 1.07               | (0.88 – 1.29)  |
| 133 – 155              | 5,132    | 458      | 8.9      | 2.02              | (1.69 – 2.43)  | 1.62               | (1.34 – 1.95)  |
| 156 – 171              | 2,424    | 274      | 11.3     | 2.68              | (2.19 – 3.27)  | 1.95               | (1.58 – 2.41)  |
| 172 – 193              | 1,607    | 251      | 15.6     | 3.88              | (3.16 – 4.78)  | 2.76               | (2.21 – 3.43)  |
| 194 – 211              | 549      | 95       | 17.3     | 4.49              | (3.41 – 5.90)  | 2.91               | (2.18 – 3.89)  |
| >= 212                 | 208      | 51       | 24.5     | 6.94              | (4.85 – 9.91)  | 4.65               | (3.19 – 6.79)  |
| <b>2-hr PG (mg/dL)</b> | <b>N</b> | <b>#</b> | <b>%</b> | <b>Model I OR</b> | <b>95% CI</b>  | <b>Model II OR</b> | <b>95% CI</b>  |
| ≤ 90                   | 3,599    | 193      | 5.4      | 1.00              |                | 1.00               |                |
| 91 – 108               | 6,353    | 401      | 6.3      | 1.21              | (1.02 – 1.45)  | 1.06               | (0.88 – 1.27)  |
| 109 – 125              | 5,039    | 440      | 8.7      | 1.79              | (1.50 – 2.14)  | 1.44               | (1.20 – 1.73)  |
| 126 – 139              | 2,609    | 286      | 11.0     | 2.37              | (1.95 – 2.88)  | 1.72               | (1.40 – 2.11)  |
| 140 – 157              | 1,495    | 202      | 13.5     | 3.00              | (2.43 – 3.71)  | 2.21               | (1.77 – 2.76)  |
| 158 – 177              | 596      | 109      | 18.3     | 4.35              | (3.36 – 5.63)  | 2.86               | (2.18 – 3.77)  |
| >= 178                 | 194      | 40       | 20.6     | 5.09              | (3.48 – 7.47)  | 3.48               | (2.33 – 5.21)  |

\*Cord C-peptide > 90<sup>th</sup> percentile: Defined from the total HAPO sample with a C-peptide result

Model I: Adjusted for field center

Model II: Adjusted for field center, age, BMI, BMI<sup>2</sup>, height, parity, smoking, alcohol use, hospitalization prior to delivery, any family history of diabetes, mean arterial blood pressure (MAP), MAP<sup>2</sup>, gestational age at OGTT, and cord glucose (excluding 200 women who were missing the cord glucose), baby's sex

N = total number in the glucose category (excluding fetal deaths), # = number in the glucose category with the outcome, % = proportion in the glucose category with the outcome

**Table F. Relationship\* between maternal glucose and primary and secondary perinatal outcomes.**

| Outcome                                | Model I OR | 95% CI        | Model II OR | 95% CI        |
|----------------------------------------|------------|---------------|-------------|---------------|
| <b>a. Primary Outcomes</b>             |            |               |             |               |
| Birthweight > 90 <sup>th</sup> %ile    |            |               |             |               |
| FPG                                    | 1.49       | (1.43 – 1.55) | 1.38        | (1.32 – 1.44) |
| 1-hr PG                                | 1.39       | (1.33 – 1.45) | 1.46        | (1.39 – 1.53) |
| 2-hr PG                                | 1.31       | (1.25 – 1.36) | 1.38        | (1.32 – 1.44) |
| Primary cesarean section               |            |               |             |               |
| FPG                                    | 1.26       | (1.21 – 1.30) | 1.11        | (1.06 – 1.15) |
| 1-hr PG                                | 1.25       | (1.21 – 1.30) | 1.10        | (1.06 – 1.15) |
| 2-hr PG                                | 1.21       | (1.17 – 1.26) | 1.08        | (1.03 -1.12)  |
| Clinical neonatal hypoglycemia         |            |               |             |               |
| FPG                                    | 1.17**     | (1.06 – 1.28) | 1.08**      | (0.98 – 1.19) |
| 1-hr PG                                | 1.24       | (1.13 – 1.36) | 1.13        | (1.03 – 1.26) |
| 2-hr PG                                | 1.19       | (1.09 – 1.31) | 1.10        | (1.00 – 1.12) |
| Cord C-peptide > 90 <sup>th</sup> %ile |            |               |             |               |
| FPG                                    | 1.77       | (1.69 – 1.86) | 1.55        | (1.47 – 1.64) |
| 1-hr PG                                | 1.63       | (1.55 – 1.71) | 1.46        | (1.38 – 1.54) |
| 2-hr PG                                | 1.51       | (1.44 – 1.59) | 1.37        | (1.30 – 1.44) |
| <b>b. Secondary Outcomes</b>           |            |               |             |               |
| Premature delivery (< 37 wks)          |            |               |             |               |
| FPG                                    | 1.08***    | (1.02 – 1.14) | 1.05        | (0.99 – 1.11) |
| 1-hr PG                                | 1.21       | (1.15 – 1.27) | 1.18        | (1.12 – 1.25) |
| 2-hr PG                                | 1.20       | (1.14 – 1.26) | 1.16        | (1.10 – 1.23) |
| Shoulder dystocia and/or birth injury  |            |               |             |               |
| FPG                                    | 1.19       | (1.06 – 1.33) | 1.18        | (1.04 – 1.33) |
| 1-hr PG                                | 1.22       | (1.09 – 1.36) | 1.23        | (1.09 – 1.38) |
| 2-hr PG                                | 1.20       | (1.08 – 1.34) | 1.22        | (1.09 – 1.37) |
| Intensive neonatal care                |            |               |             |               |
| FPG                                    | 1.07       | (1.02 – 1.13) | 0.99        | (0.94 – 1.05) |
| 1-hr PG                                | 1.14       | (1.09 – 1.20) | 1.07        | (1.02 – 1.13) |
| 2-hr PG                                | 1.15       | (1.10 – 1.21) | 1.09        | (1.03 – 1.14) |
| Hyperbilirubinemia                     |            |               |             |               |
| FPG                                    | 1.06       | (1.01 – 1.11) | 1.00        | (0.95 – 1.05) |
| 1-hr PG                                | 1.16       | (1.10 – 1.21) | 1.11        | (1.05 – 1.17) |

|               |      |               |      |               |
|---------------|------|---------------|------|---------------|
| 2-hr PG       | 1.12 | (1.07 – 1.18) | 1.08 | (1.02 – 1.13) |
| Pre-eclampsia |      |               |      |               |
| FPG           | 1.47 | (1.39 – 1.56) | 1.21 | (1.13 – 1.29) |
| 1-hr PG       | 1.39 | (1.30 – 1.47) | 1.28 | (1.20 – 1.37) |
| 2-hr PG       | 1.36 | (1.28 – 1.44) | 1.28 | (1.20 – 1.37) |

\*Continuous variable analysis, glucose higher by 1 standard deviation (6.9 mg/dL for FPG, 30.9 mg/dL for 1-hr PG, 23.5 mg/dL for 2-hr PG) (mmol/L = mg/dL/18)

Model I: Adjusted for field center. Models for birthweight were adjusted for variables used in estimating 90<sup>th</sup> %iles (Table B).

Model II: All models were adjusted for field center, age, BMI, height, smoking, alcohol use, family history of diabetes, gestational age at OGTT, baby's sex, parity (not included in model for primary cesarean delivery), hospitalization prior to delivery (not included in model for pre-eclampsia), mean arterial blood pressure (not included in model for pre-eclampsia). Cord glucose was included in the model for C-peptide > 90<sup>th</sup> %ile, and family history of hypertension and prenatal UTI were included in the model for pre-eclampsia.
